# Supplementary material for: Influence of water on the CH3O˙ + O2 → CH2O + HO2˙ reaction
Source: Royal Society of Chemistry journal article supplement (doi:10.1039/c9cp00720b), 2019-01-01
Supplement: c9cp00720b1.pdf [file c9cp00720b1.pdf]

# Supplementary Information For Influence of Water on the $\text{CH}_3\text{O}^\bullet + \text{O}_2 \rightarrow \text{CH}_2\text{O} + \text{HO}_2^\bullet$ Reaction

Subhasish Mallick,<sup>†</sup> Amit Kumar,<sup>†</sup> Brijesh Kumar Mishra,<sup>‡</sup> and Pradeep  
Kumar<sup>\*,†</sup>

<sup>†</sup>*Department of Chemistry, Malaviya National Institute of Technology Jaipur, Jaipur,  
302017, India*

<sup>‡</sup>*Department of Chemistry, International Institute of Information Technology Bangalore,  
Bangalore, 560100, India*

E-mail: pradeep.chy@mnit.ac.in

| Sl. No. | Contents                                                                                                                                                                                                        |
|---------|-----------------------------------------------------------------------------------------------------------------------------------------------------------------------------------------------------------------|
| 1       | Formal proof for the same value of termolecular rate constant for the paths A, B and C                                                                                                                          |
| 2       | <b>Table S1</b> :Optimized geometries in cartesian coordinates and all normal mode frequencies calculated at the MN15-L/aug-cc-pVTZ theory                                                                      |
| 3       | <b>Table S2</b> :Termolecular rate constant ( $k_t$ ) in $\text{cm}^6 \text{ molecule}^{-2} \text{ sec}^{-1}$ for WM catalyzed reaction within temperature range (213 K - 900 K)                                |
| 4       | <b>Table S3</b> :Absolute energies (hartree) for all the species calculated at MN15L/aug-cc-pVTZ theory                                                                                                         |
| 5       | <b>Table S4</b> : Relative energies ( $\Delta E_{WM}$ ) including ZPE ( $\text{kcal mol}^{-1}$ ) for the complexes of water catalyzed channels with respect to the isolated reactants at the MN15-L/aug-cc-pVTZ |
| 6       | Details of post-CCSD(T) calculations                                                                                                                                                                            |
| 7       | <b>Table S5</b> :Absolute energies (hartree) for $\text{TS}_{SHAT}$ and isolated reactants calculated at CCSD(T) level of theory                                                                                |
| 8       | <b>Table S6</b> :Absolute energies (hartree) for and isolated reactants calculated at post-CCSD(T) level of theory                                                                                              |
| 9       | <b>Table S7</b> : Contribution from post-CCSD(T) corrections to the energy barrier for SHAT channel                                                                                                             |
| 10      | <b>Table S8</b> : Ratio between CVT and TST ( $\Gamma$ ) and tunneling coefficient ( $\kappa_{SCT}$ ) for SHAT and DHAT path at various different temperatures                                                  |
| 11      | <b>Table S9</b> : Tunneling coefficient for SHAT and DHAT path at various different temperatures.                                                                                                               |
| 12      | <b>Table S10</b> : Rate constants for uncatalyzed channel obtained at CVT/SCT, TST/ZCT and TST/Eckart method at various temperature range                                                                       |
| 13      | <b>References</b>                                                                                                                                                                                               |

# 1 Formal proof for the same value of termolecular rate constant for the paths A, B and C

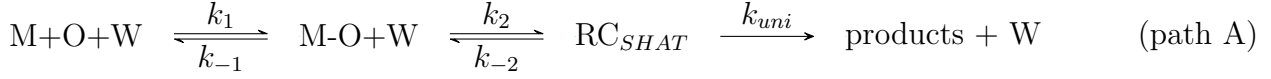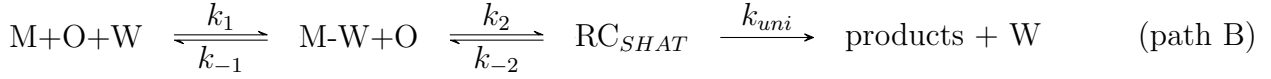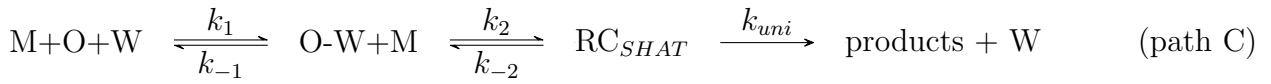

For path A,

$$K_{eq1} = \frac{[M-O]}{[M][O]} \quad (1)$$

and

$$K_{eq2} = \frac{[RC_{SHAT}]}{[M-O][W]} \quad (2)$$

Therefore,

$$K_{eq1} \times K_{eq2} = \frac{[RC_{SHAT}]}{[M][O][W]} \quad (3)$$

Similarly, for path B,

$$K_{eq1} \times K_{eq2} = \frac{[M-W]}{[M][W]} \times \frac{[RC_{SHAT}]}{[M-W][O]} \quad (4)$$

$$K_{eq1} \times K_{eq2} = \frac{[RC_{SHAT}]}{[M][O][W]} \quad (5)$$

and similarly, for path C,

$$K_{eq1} \times K_{eq2} = \frac{[O - W]}{[O][W]} \times \frac{[RC_{SHAT}]}{[O - W][M]} \quad (6)$$

$$K_{eq1} \times K_{eq2} = \frac{[RC_{SHAT}]}{[M][O][W]} \quad (7)$$

From the equations 3, 5 and 7, it is clear that, the product of  $K_{eq1}$  and  $K_{eq2}$  is same for path A, B and C. As the  $k_{uni}$  for path A, B and C are also same, it gives same trimolecular rate  $k_t$ .

**Table S1: Optimized geometries in Cartesian coordinates and normal mode frequencies of all species calculated at MN15L/aug-cc-pVTZ theory**

| species           | cartesian coordinate(Å) |           |           | frequency(cm <sup>-1</sup> ) |      |      |      |
|-------------------|-------------------------|-----------|-----------|------------------------------|------|------|------|
| CH <sub>3</sub> O | O                       | -0.010886 | 0.790359  | 0.00                         | 630  | 972  | 1139 |
|                   | C                       | -0.010886 | -0.571036 | 0.00                         | 1363 | 1364 | 1512 |
|                   | H                       | 1.064364  | -0.873809 | 0.00                         | 2887 | 2958 | 2998 |
|                   | H                       | -0.455982 | -1.011423 | 0.917135                     |      |      |      |
|                   | H                       | -0.455982 | -1.011423 | -0.917135                    |      |      |      |
| O <sub>2</sub>    | O                       | 0.00      | 0.00      | 0.603041                     | 1682 |      |      |
|                   | O                       | 0.00      | 0.00      | -0.603041                    |      |      |      |
| H <sub>2</sub> O  | O                       | 0.00      | 0.00      | 0.118681                     | 1666 | 3866 |      |
|                   | H                       | 0.00      | 0.758828  | -0.474724                    |      |      |      |
|                   | H                       | 0.00      | -0.758828 | -0.474724                    |      |      |      |
| CH <sub>2</sub> O | C                       | 0.00      | 0.00      | -0.527095                    | 1199 | 1255 | 1532 |
|                   | H                       | 0.00      | 0.949407  | -1.122282                    | 1847 | 2856 | 2897 |
|                   | H                       | 0.00      | -0.949407 | -1.122282                    |      |      |      |
|                   | O                       | 0.00      | 0.00      | 0.675892                     |      |      |      |
| HO <sub>2</sub>   | O                       | 0.055586  | -0.608155 | 0.00                         | 1199 | 1463 | 3645 |
|                   | H                       | -0.889376 | -0.865124 | 0.00                         |      |      |      |
|                   | O                       | 0.055586  | 0.716295  | 0.00                         |      |      |      |
| O-W               | O                       | -2.1019   | -0.00194  | -0.001023                    | 34   | 71   | 79   |
|                   | H                       | -1.494939 | -0.750262 | 0.00298                      | 102  | 156  | 1666 |
|                   | H                       | -1.521848 | 0.76748   | 0.004235                     | 1681 | 3865 | 3972 |
|                   | O                       | 1.237853  | -0.603193 | 0.000223                     |      |      |      |
|                   | O                       | 1.241145  | 0.602981  | -0.000102                    |      |      |      |
| M-W               | C                       | -1.194411 | -0.543131 | -0.000001                    | 138  | 152  | 156  |
|                   | H                       | -0.660308 | -0.991577 | 0.869242                     | 161  | 196  | 294  |
|                   | H                       | -2.262247 | -0.835344 | 0.000127                     | 563  | 1053 | 1199 |
|                   | H                       | -0.66055  | -0.991499 | -0.869434                    | 1332 | 1413 | 1487 |
|                   | O                       | 1.834903  | -0.151039 | 0.000014                     | 1666 | 2902 | 2953 |
|                   | O                       | -0.979627 | 0.804231  | 0.00001                      | 3026 | 3826 | 3956 |
|                   | H                       | 1.206048  | 0.583505  | -0.000097                    |      |      |      |
|                   | H                       | 2.701309  | 0.268167  | -0.000026                    |      |      |      |
| M-O               | C                       | 1.282028  | 0.460709  | 0.00                         | 175  | 243  | 341  |
|                   | H                       | 1.486644  | -0.143796 | 0.903472                     | 431  | 684  | 1051 |
|                   | H                       | 1.936139  | 1.348969  | 0.00                         | 1170 | 1178 | 1381 |
|                   | H                       | 1.486644  | -0.143796 | -0.903472                    | 1429 | 1438 | 1502 |
|                   | O                       | 0.00      | 1.003376  | 0.00                         | 2976 | 3052 | 3095 |
|                   | O                       | -1.042463 | -0.177303 | 0.00                         |      |      |      |
|                   | O                       | -0.532736 | -1.304277 | 0.00                         |      |      |      |

| species            | cartesian coordinate(Å) |           |           | frequency(cm <sup>-1</sup> ) |       |      |      |
|--------------------|-------------------------|-----------|-----------|------------------------------|-------|------|------|
| RC <sub>DHAT</sub> | O                       | 0.503389  | -1.505174 | -0.58743                     | 35    | 67   | 83   |
|                    | O                       | 0.630647  | -1.416163 | 0.608272                     | 86    | 96   | 103  |
|                    | H                       | 2.151609  | 0.677876  | 0.567767                     | 114   | 133  | 140  |
|                    | C                       | -1.394059 | 1.059565  | 0.090565                     | 188   | 210  | 765  |
|                    | H                       | -0.767429 | 1.014709  | 1.008168                     | 980   | 1137 | 1339 |
|                    | H                       | -1.94091  | 2.023029  | 0.018746                     | 1367  | 1511 | 1664 |
|                    | O                       | -2.1874   | -0.033305 | -0.070532                    | 1680  | 2884 | 2953 |
|                    | O                       | 1.910396  | 1.336681  | -0.093485                    | 2995  | 3861 | 3969 |
|                    | H                       | 2.723683  | 1.831585  | -0.241458                    |       |      |      |
|                    | H                       | -0.658851 | 1.039106  | -0.751213                    |       |      |      |
| RC <sub>SHAT</sub> | C                       | -1.422785 | -0.840207 | -0.544291                    | 35    | 67   | 83   |
|                    | H                       | -2.507856 | -0.733842 | -0.78656                     | 86    | 96   | 103  |
|                    | H                       | -1.149541 | -1.898299 | -0.736841                    | 114   | 133  | 140  |
|                    | H                       | -0.891147 | -0.14563  | -1.227999                    | 188   | 210  | 765  |
|                    | O                       | 1.394481  | -0.576439 | 0.621504                     | 980   | 1137 | 1339 |
|                    | O                       | 1.689623  | -0.582737 | -0.546043                    | 1367  | 1511 | 1664 |
|                    | O                       | -0.091287 | 2.067444  | -0.184768                    | 1680  | 2884 | 2953 |
|                    | O                       | -1.302363 | -0.485694 | 0.768953                     | 2995  | 3861 | 3969 |
|                    | H                       | -0.510506 | 1.524342  | 0.497059                     |       |      |      |
|                    | H                       | 0.072134  | 2.914077  | 0.242918                     |       |      |      |
| TS <sub>SHAT</sub> | O                       | -0.737822 | -1.072386 | 0.591976                     | -592  | 69   | 111  |
|                    | O                       | -0.866089 | -1.173219 | -0.606338                    | 149   | 159  | 247  |
|                    | H                       | -0.693866 | 0.256726  | -1.028963                    | 270   | 302  | 405  |
|                    | C                       | -0.537604 | 1.33158   | -0.4738                      | 454   | 580  | 834  |
|                    | H                       | 0.391016  | 1.659238  | -0.995958                    | 1096  | 1266 | 1274 |
|                    | H                       | -1.467228 | 1.869616  | -0.771712                    | 1353  | 1513 | 1589 |
|                    | O                       | -0.424083 | 1.012366  | 0.775733                     | 1661  | 1873 | 2890 |
|                    | O                       | 2.085685  | -0.200077 | -0.156602                    | 2973  | 3821 | 3956 |
|                    | H                       | 2.937333  | -0.466553 | 0.203806                     |       |      |      |
|                    | H                       | 1.59684   | 0.15803   | 0.597478                     |       |      |      |
| TS <sub>DHAT</sub> | O                       | -1.422321 | -1.019279 | -0.074316                    | -1569 | 60   | 88   |
|                    | O                       | -2.073366 | 0.028446  | 0.097352                     | 110   | 183  | 230  |
|                    | H                       | -0.824351 | 1.0859    | 0.108607                     | 301   | 335  | 400  |
|                    | C                       | 2.030908  | -0.094354 | 0.073561                     | 487   | 617  | 828  |
|                    | H                       | 2.630072  | 0.273494  | -0.799654                    | 1086  | 1154 | 1212 |
|                    | H                       | 2.469699  | 0.13956   | 1.076339                     | 1390  | 1443 | 1491 |
|                    | O                       | 1.284066  | -1.110284 | -0.064274                    | 1569  | 1659 | 2823 |
|                    | O                       | 0.026875  | 1.61822   | 0.034353                     | 2892  | 3020 | 3835 |
|                    | H                       | 0.007633  | 2.042033  | -0.837438                    |       |      |      |
|                    | H                       | 1.009471  | 0.888318  | 0.065863                     |       |      |      |
| PC                 | O                       | 0.989098  | -1.26043  | 0.017269                     | 34    | 41   | 78   |
|                    | O                       | 2.136387  | -0.605005 | 0.067525                     | 99    | 136  | 158  |
|                    | H                       | 1.859173  | 0.347518  | 0.017206                     | 187   | 226  | 257  |
|                    | O                       | 0.726267  | 1.738878  | -0.165839                    | 371   | 587  | 629  |
|                    | H                       | 0.704227  | 2.4904    | 0.435105                     | 1214  | 1239 | 1263 |
|                    | H                       | -0.140283 | 1.310035  | -0.062034                    | 1529  | 1577 | 1680 |
|                    | C                       | -2.200225 | -0.696878 | -0.110888                    | 1827  | 2891 | 2976 |
|                    | O                       | -1.918961 | 0.442294  | 0.177177                     | 3395  | 3738 | 3940 |
|                    | H                       | -3.224749 | -1.102946 | 0.078803                     |       |      |      |
|                    | H                       | -1.459347 | -1.389643 | -0.572811                    |       |      |      |

Table S2: Termolecular rate constant ( $k_t$ ) in  $\text{cm}^6 \text{ molecule}^{-2} \text{ sec}^{-1}$  for WM catalyzed reaction within temperature range (213 K - 900 K)

| Temp(K) | pathA                  |                        |                    | pathB                  |                        |                        | pathC                  |                        |                       | pathD                  |                        |                       |
|---------|------------------------|------------------------|--------------------|------------------------|------------------------|------------------------|------------------------|------------------------|-----------------------|------------------------|------------------------|-----------------------|
|         | $K_{\text{opt}}$       | $K_{\text{eq2}}$       | $k_{\text{uni}}$   | $K_{\text{opt}}$       | $K_{\text{eq2}}$       | $k_{\text{uni}}$       | $K_{\text{opt}}$       | $K_{\text{eq2}}$       | $k_{\text{uni}}$      | $K_{\text{opt}}$       | $K_{\text{eq2}}$       | $k_{\text{uni}}$      |
| 213     | $2.11 \times 10^{-27}$ | $4.39 \times 10^{-19}$ | $6.89 \times 10^7$ | $3.26 \times 10^{-22}$ | $2.84 \times 10^{-23}$ | $7.65 \times 10^{-37}$ | $3.09 \times 10^{-37}$ | $2.99 \times 10^{-23}$ | $6.89 \times 10^{23}$ | $7.05 \times 10^{-37}$ | $4.23 \times 10^{-24}$ | $1.98 \times 10^{-9}$ |
| 216     | $2.11 \times 10^{-27}$ | $3.73 \times 10^{-19}$ | $7.45 \times 10^7$ | $2.93 \times 10^{-22}$ | $2.69 \times 10^{-23}$ | $7.03 \times 10^{-37}$ | $3.12 \times 10^{-37}$ | $2.52 \times 10^{-23}$ | $7.45 \times 10^{23}$ | $7.02 \times 10^{-37}$ | $3.85 \times 10^{-24}$ | $3.12 \times 10^{-9}$ |
| 219     | $2.11 \times 10^{-27}$ | $3.18 \times 10^{-19}$ | $8.03 \times 10^7$ | $2.63 \times 10^{-22}$ | $2.55 \times 10^{-23}$ | $6.47 \times 10^{-37}$ | $3.14 \times 10^{-37}$ | $2.14 \times 10^{-23}$ | $8.03 \times 10^7$    | $6.47 \times 10^{-37}$ | $3.52 \times 10^{-24}$ | $4.89 \times 10^{-9}$ |
| 224     | $2.12 \times 10^{-27}$ | $2.47 \times 10^{-19}$ | $9.07 \times 10^7$ | $2.22 \times 10^{-22}$ | $2.35 \times 10^{-23}$ | $5.69 \times 10^{-37}$ | $3.19 \times 10^{-37}$ | $1.64 \times 10^{-23}$ | $9.07 \times 10^7$    | $5.69 \times 10^{-37}$ | $3.04 \times 10^{-24}$ | $1.04 \times 10^{-8}$ |
| 230     | $2.13 \times 10^{-27}$ | $1.85 \times 10^{-19}$ | $1.04 \times 10^8$ | $1.84 \times 10^{-22}$ | $1.98 \times 10^{-23}$ | $4.91 \times 10^{-37}$ | $3.24 \times 10^{-37}$ | $1.21 \times 10^{-23}$ | $1.04 \times 10^8$    | $4.92 \times 10^{-37}$ | $2.58 \times 10^{-24}$ | $2.34 \times 10^{-8}$ |
| 235     | $2.13 \times 10^{-27}$ | $1.47 \times 10^{-19}$ | $1.16 \times 10^8$ | $1.58 \times 10^{-22}$ | $1.62 \times 10^{-23}$ | $4.38 \times 10^{-37}$ | $3.29 \times 10^{-37}$ | $9.54 \times 10^{-24}$ | $1.16 \times 10^8$    | $4.39 \times 10^{-37}$ | $2.27 \times 10^{-24}$ | $4.58 \times 10^{-8}$ |
| 250     | $2.15 \times 10^{-27}$ | $7.95 \times 10^{-20}$ | $1.58 \times 10^8$ | $1.05 \times 10^{-22}$ | $1.62 \times 10^{-23}$ | $3.24 \times 10^{-37}$ | $3.45 \times 10^{-37}$ | $4.96 \times 10^{-24}$ | $1.58 \times 10^8$    | $3.24 \times 10^{-37}$ | $1.60 \times 10^{-24}$ | $2.99 \times 10^{-7}$ |
| 259     | $2.16 \times 10^{-27}$ | $5.72 \times 10^{-20}$ | $1.86 \times 10^8$ | $8.47 \times 10^{-23}$ | $1.46 \times 10^{-23}$ | $2.77 \times 10^{-37}$ | $3.55 \times 10^{-37}$ | $3.48 \times 10^{-24}$ | $1.86 \times 10^8$    | $2.77 \times 10^{-37}$ | $1.33 \times 10^{-24}$ | $8.39 \times 10^{-7}$ |
| 265     | $2.17 \times 10^{-27}$ | $4.66 \times 10^{-20}$ | $2.07 \times 10^8$ | $7.39 \times 10^{-23}$ | $1.37 \times 10^{-23}$ | $2.51 \times 10^{-37}$ | $3.63 \times 10^{-37}$ | $2.79 \times 10^{-24}$ | $2.07 \times 10^8$    | $2.51 \times 10^{-37}$ | $1.18 \times 10^{-24}$ | $1.61 \times 10^{-6}$ |
| 278     | $2.19 \times 10^{-27}$ | $3.10 \times 10^{-20}$ | $2.55 \times 10^8$ | $5.65 \times 10^{-23}$ | $1.20 \times 10^{-23}$ | $2.08 \times 10^{-37}$ | $3.79 \times 10^{-37}$ | $1.79 \times 10^{-24}$ | $2.55 \times 10^8$    | $2.08 \times 10^{-37}$ | $9.39 \times 10^{-25}$ | $6.06 \times 10^{-6}$ |
| 280     | $2.20 \times 10^{-27}$ | $2.93 \times 10^{-20}$ | $2.63 \times 10^8$ | $5.44 \times 10^{-23}$ | $1.18 \times 10^{-23}$ | $2.03 \times 10^{-37}$ | $3.82 \times 10^{-37}$ | $1.68 \times 10^{-24}$ | $2.63 \times 10^8$    | $2.03 \times 10^{-37}$ | $9.09 \times 10^{-25}$ | $7.35 \times 10^{-6}$ |
| 290     | $2.21 \times 10^{-27}$ | $2.22 \times 10^{-20}$ | $3.05 \times 10^8$ | $4.53 \times 10^{-23}$ | $1.08 \times 10^{-23}$ | $1.79 \times 10^{-37}$ | $4.05 \times 10^{-37}$ | $1.24 \times 10^{-24}$ | $3.05 \times 10^8$    | $1.84 \times 10^{-37}$ | $7.78 \times 10^{-25}$ | $1.87 \times 10^{-5}$ |
| 298     | $2.23 \times 10^{-27}$ | $1.80 \times 10^{-20}$ | $3.40 \times 10^8$ | $3.95 \times 10^{-23}$ | $1.02 \times 10^{-23}$ | $1.64 \times 10^{-37}$ | $4.07 \times 10^{-37}$ | $9.34 \times 10^{-25}$ | $3.40 \times 10^8$    | $1.64 \times 10^{-37}$ | $6.94 \times 10^{-25}$ | $4.77 \times 10^{-5}$ |
| 300     | $2.23 \times 10^{-27}$ | $1.72 \times 10^{-20}$ | $3.49 \times 10^8$ | $3.82 \times 10^{-23}$ | $1.00 \times 10^{-23}$ | $1.60 \times 10^{-37}$ | $4.10 \times 10^{-37}$ | $9.87 \times 10^{-25}$ | $3.49 \times 10^8$    | $1.61 \times 10^{-37}$ | $6.75 \times 10^{-25}$ | $4.77 \times 10^{-5}$ |
| 310     | $2.25 \times 10^{-27}$ | $1.36 \times 10^{-20}$ | $3.97 \times 10^8$ | $3.28 \times 10^{-23}$ | $9.32 \times 10^{-24}$ | $1.45 \times 10^{-37}$ | $4.25 \times 10^{-37}$ | $7.19 \times 10^{-25}$ | $3.97 \times 10^8$    | $1.45 \times 10^{-37}$ | $5.93 \times 10^{-25}$ | $1.01 \times 10^{-4}$ |
| 320     | $2.27 \times 10^{-27}$ | $1.09 \times 10^{-20}$ | $4.47 \times 10^8$ | $2.84 \times 10^{-23}$ | $8.74 \times 10^{-24}$ | $1.33 \times 10^{-37}$ | $4.41 \times 10^{-37}$ | $5.64 \times 10^{-25}$ | $4.47 \times 10^8$    | $1.33 \times 10^{-37}$ | $5.26 \times 10^{-25}$ | $2.20 \times 10^{-4}$ |
| 330     | $2.29 \times 10^{-27}$ | $8.96 \times 10^{-21}$ | $5.00 \times 10^8$ | $2.49 \times 10^{-23}$ | $8.24 \times 10^{-24}$ | $1.23 \times 10^{-37}$ | $4.57 \times 10^{-37}$ | $4.99 \times 10^{-25}$ | $5.00 \times 10^8$    | $1.23 \times 10^{-37}$ | $4.71 \times 10^{-25}$ | $4.55 \times 10^{-4}$ |
| 350     | $2.34 \times 10^{-27}$ | $6.28 \times 10^{-21}$ | $6.13 \times 10^8$ | $1.98 \times 10^{-23}$ | $7.43 \times 10^{-24}$ | $1.08 \times 10^{-37}$ | $4.91 \times 10^{-37}$ | $2.99 \times 10^{-25}$ | $6.13 \times 10^8$    | $1.08 \times 10^{-37}$ | $3.89 \times 10^{-25}$ | $1.74 \times 10^{-3}$ |
| 375     | $2.40 \times 10^{-27}$ | $4.31 \times 10^{-21}$ | $7.67 \times 10^8$ | $1.55 \times 10^{-23}$ | $6.69 \times 10^{-24}$ | $9.52 \times 10^{-38}$ | $5.38 \times 10^{-38}$ | $1.93 \times 10^{-25}$ | $7.67 \times 10^8$    | $9.52 \times 10^{-38}$ | $3.18 \times 10^{-25}$ | $7.70 \times 10^{-3}$ |
| 400     | $2.47 \times 10^{-27}$ | $3.15 \times 10^{-21}$ | $9.32 \times 10^8$ | $1.26 \times 10^{-23}$ | $6.16 \times 10^{-24}$ | $8.70 \times 10^{-38}$ | $5.88 \times 10^{-38}$ | $1.32 \times 10^{-25}$ | $9.32 \times 10^8$    | $8.70 \times 10^{-38}$ | $2.70 \times 10^{-25}$ | $2.87 \times 10^{-2}$ |
| 425     | $2.54 \times 10^{-27}$ | $2.42 \times 10^{-21}$ | $1.11 \times 10^9$ | $1.07 \times 10^{-23}$ | $5.78 \times 10^{-24}$ | $8.18 \times 10^{-38}$ | $6.42 \times 10^{-38}$ | $9.59 \times 10^{-26}$ | $1.11 \times 10^9$    | $8.18 \times 10^{-38}$ | $2.36 \times 10^{-25}$ | $9.29 \times 10^{-2}$ |
| 450     | $2.62 \times 10^{-27}$ | $1.94 \times 10^{-21}$ | $1.29 \times 10^9$ | $9.26 \times 10^{-24}$ | $5.49 \times 10^{-24}$ | $7.86 \times 10^{-38}$ | $6.99 \times 10^{-38}$ | $7.27 \times 10^{-26}$ | $1.29 \times 10^9$    | $7.86 \times 10^{-38}$ | $2.11 \times 10^{-25}$ | $2.67 \times 10^{-1}$ |
| 475     | $2.71 \times 10^{-27}$ | $1.60 \times 10^{-21}$ | $1.48 \times 10^9$ | $8.23 \times 10^{-24}$ | $5.28 \times 10^{-24}$ | $7.70 \times 10^{-38}$ | $7.61 \times 10^{-38}$ | $5.71 \times 10^{-26}$ | $1.48 \times 10^9$    | $7.70 \times 10^{-38}$ | $1.92 \times 10^{-25}$ | $6.92 \times 10^{-1}$ |
| 500     | $2.80 \times 10^{-27}$ | $1.37 \times 10^{-21}$ | $1.67 \times 10^9$ | $7.45 \times 10^{-24}$ | $5.13 \times 10^{-24}$ | $7.65 \times 10^{-38}$ | $8.26 \times 10^{-38}$ | $4.63 \times 10^{-26}$ | $1.67 \times 10^9$    | $7.65 \times 10^{-38}$ | $1.79 \times 10^{-25}$ | $1.65$                |
| 550     | $3.00 \times 10^{-27}$ | $1.06 \times 10^{-21}$ | $2.06 \times 10^9$ | $6.40 \times 10^{-24}$ | $4.95 \times 10^{-24}$ | $7.84 \times 10^{-38}$ | $9.68 \times 10^{-38}$ | $3.27 \times 10^{-26}$ | $2.06 \times 10^9$    | $7.84 \times 10^{-38}$ | $1.60 \times 10^{-25}$ | $7.58$                |
| 600     | $3.21 \times 10^{-27}$ | $8.77 \times 10^{-22}$ | $2.46 \times 10^9$ | $5.76 \times 10^{-24}$ | $4.89 \times 10^{-24}$ | $8.32 \times 10^{-38}$ | $1.13 \times 10^{-22}$ | $2.50 \times 10^{-26}$ | $2.46 \times 10^9$    | $8.31 \times 10^{-38}$ | $1.49 \times 10^{-25}$ | $2.77 \times 10^1$    |
| 650     | $3.44 \times 10^{-27}$ | $7.65 \times 10^{-22}$ | $2.86 \times 10^9$ | $5.37 \times 10^{-24}$ | $4.91 \times 10^{-24}$ | $9.04 \times 10^{-38}$ | $1.30 \times 10^{-22}$ | $2.03 \times 10^{-26}$ | $2.86 \times 10^9$    | $9.04 \times 10^{-38}$ | $1.43 \times 10^{-25}$ | $8.51 \times 10^1$    |
| 700     | $3.70 \times 10^{-27}$ | $6.93 \times 10^{-22}$ | $3.26 \times 10^9$ | $5.14 \times 10^{-24}$ | $4.99 \times 10^{-24}$ | $1.00 \times 10^{-37}$ | $1.49 \times 10^{-22}$ | $1.72 \times 10^{-26}$ | $3.26 \times 10^9$    | $1.00 \times 10^{-37}$ | $1.41 \times 10^{-25}$ | $2.26 \times 10^2$    |
| 725     | $3.83 \times 10^{-27}$ | $6.67 \times 10^{-22}$ | $3.45 \times 10^9$ | $5.06 \times 10^{-24}$ | $5.05 \times 10^{-24}$ | $1.06 \times 10^{-37}$ | $1.59 \times 10^{-22}$ | $1.61 \times 10^{-26}$ | $3.45 \times 10^9$    | $1.06 \times 10^{-37}$ | $1.40 \times 10^{-25}$ | $3.53 \times 10^2$    |
| 775     | $4.11 \times 10^{-27}$ | $6.29 \times 10^{-22}$ | $3.84 \times 10^9$ | $4.98 \times 10^{-24}$ | $5.20 \times 10^{-24}$ | $1.19 \times 10^{-37}$ | $1.81 \times 10^{-22}$ | $1.43 \times 10^{-26}$ | $3.84 \times 10^9$    | $1.19 \times 10^{-37}$ | $1.41 \times 10^{-25}$ | $7.96 \times 10^2$    |
| 800     | $4.25 \times 10^{-27}$ | $6.16 \times 10^{-22}$ | $4.03 \times 10^9$ | $4.96 \times 10^{-24}$ | $5.28 \times 10^{-24}$ | $1.27 \times 10^{-37}$ | $1.92 \times 10^{-22}$ | $1.36 \times 10^{-26}$ | $4.03 \times 10^9$    | $1.27 \times 10^{-37}$ | $1.42 \times 10^{-25}$ | $1.15 \times 10^3$    |
| 825     | $4.40 \times 10^{-27}$ | $6.06 \times 10^{-22}$ | $4.22 \times 10^9$ | $4.96 \times 10^{-24}$ | $5.38 \times 10^{-24}$ | $1.35 \times 10^{-37}$ | $2.04 \times 10^{-22}$ | $1.31 \times 10^{-26}$ | $4.22 \times 10^9$    | $1.35 \times 10^{-37}$ | $1.43 \times 10^{-25}$ | $1.64 \times 10^3$    |
| 850     | $4.56 \times 10^{-27}$ | $5.98 \times 10^{-22}$ | $4.41 \times 10^9$ | $4.97 \times 10^{-24}$ | $5.49 \times 10^{-24}$ | $1.44 \times 10^{-37}$ | $2.16 \times 10^{-22}$ | $1.26 \times 10^{-26}$ | $4.41 \times 10^9$    | $1.44 \times 10^{-37}$ | $1.45 \times 10^{-25}$ | $2.30 \times 10^3$    |
| 875     | $4.72 \times 10^{-27}$ | $5.92 \times 10^{-22}$ | $4.60 \times 10^9$ | $4.99 \times 10^{-24}$ | $5.60 \times 10^{-24}$ | $1.54 \times 10^{-37}$ | $2.29 \times 10^{-22}$ | $1.22 \times 10^{-26}$ | $4.60 \times 10^9$    | $1.54 \times 10^{-37}$ | $1.47 \times 10^{-25}$ | $3.15 \times 10^3$    |
| 900     | $4.88 \times 10^{-27}$ | $5.88 \times 10^{-22}$ | $4.78 \times 10^9$ | $5.03 \times 10^{-24}$ | $5.71 \times 10^{-24}$ | $1.65 \times 10^{-37}$ | $2.42 \times 10^{-22}$ | $1.18 \times 10^{-26}$ | $4.78 \times 10^9$    | $1.65 \times 10^{-37}$ | $1.49 \times 10^{-25}$ | $4.26 \times 10^3$    |

**Table S3: Absolute energies in hartree for all the species calculated at MN15L/aug-cc-pVTZ theory**

| Species            | MN15L/aug-cc-pVTZ |
|--------------------|-------------------|
| M-O                | -265.2150075      |
| M-W                | -191.3597637      |
| O-W                | -226.6140132      |
| RC <sub>DHAT</sub> | -341.5956539      |
| RC <sub>SHAT</sub> | -341.6002647      |
| TS <sub>DHAT</sub> | -341.5555252      |
| TS <sub>SHAT</sub> | -341.5942673      |
| PC                 | -341.6543078      |

**Table S4: Relative energies ( $\Delta E_{WM}$ ) including ZPE (kcal mol<sup>-1</sup>) for the complexes of water catalyzed channels with respect to the isolated reactants at the MN15-L/aug-cc-pVTZ**

| complexes          | $\Delta E_{WM}$ |
|--------------------|-----------------|
| M-O                | 0.54            |
| M-W                | -3.36           |
| O-W                | -0.37           |
| RC <sub>DHAT</sub> | -3.43           |
| RC <sub>SHAT</sub> | -5.29           |
| TS <sub>DHAT</sub> | 20.11           |
| TS <sub>SHAT</sub> | -1.86           |
| PC                 | -37.78          |
| product            | -26.09          |

## 2 Post-CCSD(T) Calculations

Further to check the viability of energetics obtained at MN15-L/aug-cc-pVTZ theory, we have calculated the energies of some species using ab initio method. At first, we have performed the CCSD(T) single point calculations in conjunction with aug-cc-pVTZ and aug-cc-pVQZ basis sets considering the MN15-L/aug-cc-pVTZ geometry. Using these energies, we have extrapolated the energies to corresponding CBS limit using the method, proposed and developed by Varandas and Pansini.<sup>1</sup> The obtained CCSD(T)/CBS energies have been further improved by adding the following corrections.

1. The contribution of full triple excitations estimated at CCSDT/cc-pVDZ level of theory



using MRCC code.<sup>2</sup> Here the correction is denoted as  $\Delta E_T$ .

$$\Delta E_T = [E_{CCSDT} - E_{CCSD(T)}]$$

2. The contribution of partial quadratic excitations have been estimated at CCSDT(Q)/cc-pVDZ level of theory using MRCC code.<sup>2</sup> Here the correction is denoted as  $\Delta E_{(Q)}$ .

$$\Delta E_{(Q)} = [E_{CCSDT(Q)} - E_{CCSDT}]$$

**Table S5: Absolute energies (Hartree) for the TS<sub>SHAT</sub> and isolated reactants at CCSD(T) level of theory.**

| Species            | CCSD(T)/aug-cc-pVTZ | CCSD(T)/aug-cc-pVQZ | CCSD(T)/CBS     |
|--------------------|---------------------|---------------------|-----------------|
| TS <sub>SHAT</sub> | -341.3606506        | -341.4485031        | -341.5031767843 |
| O <sub>2</sub>     | -114.8846772        | -114.9135429        | -114.9312154326 |
| CH <sub>3</sub> O• | -150.140951         | -150.1786758        | -150.2021958701 |
| H <sub>2</sub> O   | -76.3423196         | -76.3635505         | -76.3768008477  |

**Table S6: Absolute energies (Hartree) for the TS<sub>SHAT</sub> and isolated reactants at post CCSD(T) level of theory.**

| Species            | CCSD(T)/cc-pVDZ | CCSDT/cc-pVDZ   | CCSDT(Q)/cc-pVDZ |
|--------------------|-----------------|-----------------|------------------|
| TS <sub>SHAT</sub> | -340.974295     | -340.9836417801 | -340.9914067017  |
| O <sub>2</sub>     | -149.9856931155 | -149.9858841529 | -149.9877946909  |
| CH <sub>3</sub> O• | -114.7550722855 | -114.7557353041 | -114.7562151674  |
| H <sub>2</sub> O   | -76.2411932234  | -76.241357176   | -76.2418487324   |

**Table S7: Contribution from post-CCSD(T) corrections (kcal mol<sup>-1</sup>) to the energy barrier for SHAT channel**

| Complexes                                          | $\Delta E_{CCSD(T)/CBS}$ | $\Delta E_T$ | $\Delta E_{(Q)}$ | Final Barrier |
|----------------------------------------------------|--------------------------|--------------|------------------|---------------|
| CH <sub>3</sub> O+O <sub>2</sub> +H <sub>2</sub> O | 0.00                     | 0.00         | 0.00             | 0.00          |
| <b>TS<sub>SHAT</sub></b>                           | <b>4.41</b>              | <b>-5.23</b> | <b>-3.06</b>     | <b>-3.88</b>  |

**Table S8: Ratio between CVT and TST ( $\Gamma$ ) and tunneling coefficient ( $\kappa_{SCT}$ ) for SHAT and DHAT path at various different temperatures.**

| Temp(K) | SHAT               |                    |          |                | DHAT                   |                        |          |                    |
|---------|--------------------|--------------------|----------|----------------|------------------------|------------------------|----------|--------------------|
|         | TST                | CVT                | $\Gamma$ | $\kappa_{SCT}$ | TST                    | CVT                    | $\Gamma$ | $\kappa_{SCT}$     |
| 213     | $3.89 \times 10^7$ | $3.77 \times 10^7$ | 0.97     | 1.97           | $7.75 \times 10^{-15}$ | $4.93 \times 10^{-15}$ | 0.64     | $4.02 \times 10^5$ |
| 216     | $4.29 \times 10^7$ | $4.17 \times 10^7$ | 0.97     | 1.93           | $1.63 \times 10^{-14}$ | $1.04 \times 10^{-14}$ | 0.64     | $3.00 \times 10^5$ |
| 219     | $4.71 \times 10^7$ | $4.58 \times 10^7$ | 0.97     | 1.90           | $3.37 \times 10^{-14}$ | $2.16 \times 10^{-14}$ | 0.64     | $2.27 \times 10^5$ |
| 224     | $5.47 \times 10^7$ | $5.34 \times 10^7$ | 0.98     | 1.84           | $1.08 \times 10^{-13}$ | $6.95 \times 10^{-14}$ | 0.65     | $1.46 \times 10^5$ |
| 230     | $6.49 \times 10^7$ | $6.35 \times 10^7$ | 0.98     | 1.78           | $4.06 \times 10^{-13}$ | $2.64 \times 10^{-13}$ | 0.65     | $8.89 \times 10^4$ |
| 235     | $7.42 \times 10^7$ | $7.28 \times 10^7$ | 0.98     | 1.74           | $1.17 \times 10^{-12}$ | $7.61 \times 10^{-13}$ | 0.65     | $6.04 \times 10^4$ |
| 250     | $1.07 \times 10^8$ | $1.06 \times 10^8$ | 0.99     | 1.62           | $2.12 \times 10^{-11}$ | $1.41 \times 10^{-11}$ | 0.66     | $2.13 \times 10^4$ |
| 259     | $1.31 \times 10^8$ | $1.30 \times 10^8$ | 0.99     | 1.57           | $1.03 \times 10^{-10}$ | $6.86 \times 10^{-11}$ | 0.67     | $1.23 \times 10^4$ |
| 265     | $1.48 \times 10^8$ | $1.47 \times 10^8$ | 0.99     | 1.54           | $2.77 \times 10^{-10}$ | $1.86 \times 10^{-10}$ | 0.67     | $8.70 \times 10^3$ |
| 278     | $1.90 \times 10^8$ | $1.89 \times 10^8$ | 0.99     | 1.48           | $2.04 \times 10^{-9}$  | $1.38 \times 10^{-9}$  | 0.68     | $4.40 \times 10^3$ |
| 280     | $1.97 \times 10^8$ | $1.96 \times 10^8$ | 0.99     | 1.47           | $2.73 \times 10^{-9}$  | $1.85 \times 10^{-9}$  | 0.68     | $3.99 \times 10^3$ |
| 290     | $2.35 \times 10^8$ | $2.34 \times 10^8$ | 1.00     | 1.43           | $1.10 \times 10^{-8}$  | $7.48 \times 10^{-9}$  | 0.68     | $2.50 \times 10^3$ |
| 298     | $2.67 \times 10^8$ | $2.66 \times 10^8$ | 1.00     | 1.40           | $3.12 \times 10^{-8}$  | $2.14 \times 10^{-8}$  | 0.69     | $1.77 \times 10^3$ |
| 300     | $2.75 \times 10^8$ | $2.75 \times 10^8$ | 1.00     | 1.39           | $4.01 \times 10^{-8}$  | $2.75 \times 10^{-8}$  | 0.69     | $1.63 \times 10^3$ |
| 310     | $3.20 \times 10^8$ | $3.19 \times 10^8$ | 1.00     | 1.36           | $1.35 \times 10^{-7}$  | $9.29 \times 10^{-8}$  | 0.69     | $1.10 \times 10^3$ |
| 320     | $3.67 \times 10^8$ | $3.67 \times 10^8$ | 1.00     | 1.34           | $4.19 \times 10^{-7}$  | $2.90 \times 10^{-7}$  | 0.69     | $7.59 \times 10^2$ |
| 330     | $4.18 \times 10^8$ | $4.18 \times 10^8$ | 1.00     | 1.31           | $1.21 \times 10^{-6}$  | $8.46 \times 10^{-7}$  | 0.70     | $5.40 \times 10^2$ |
| 350     | $5.28 \times 10^8$ | $5.28 \times 10^8$ | 1.00     | 1.27           | $8.47 \times 10^{-6}$  | $5.95 \times 10^{-6}$  | 0.70     | $2.93 \times 10^2$ |
| 375     | $6.82 \times 10^8$ | $6.82 \times 10^8$ | 1.00     | 1.23           | $7.15 \times 10^{-5}$  | $5.07 \times 10^{-5}$  | 0.71     | $1.52 \times 10^2$ |
| 400     | $8.51 \times 10^8$ | $8.50 \times 10^8$ | 1.00     | 1.20           | $4.60 \times 10^{-4}$  | $3.29 \times 10^{-4}$  | 0.72     | $8.75 \times 10^1$ |
| 425     | $1.03 \times 10^9$ | $1.03 \times 10^9$ | 1.00     | 1.18           | $2.37 \times 10^{-3}$  | $1.71 \times 10^{-3}$  | 0.72     | $5.45 \times 10^1$ |
| 450     | $1.22 \times 10^9$ | $1.22 \times 10^9$ | 1.00     | 1.16           | $1.02 \times 10^{-2}$  | $7.36 \times 10^{-3}$  | 0.72     | $3.63 \times 10^1$ |
| 475     | $1.42 \times 10^9$ | $1.42 \times 10^9$ | 1.00     | 1.14           | $3.73 \times 10^{-2}$  | $2.72 \times 10^{-2}$  | 0.73     | $2.55 \times 10^1$ |
| 500     | $1.63 \times 10^9$ | $1.62 \times 10^9$ | 0.99     | 1.12           | $1.20 \times 10^{-1}$  | $8.79 \times 10^{-2}$  | 0.73     | $1.88 \times 10^1$ |
| 550     | $2.05 \times 10^9$ | $2.04 \times 10^9$ | 0.99     | 1.10           | $9.03 \times 10^{-1}$  | $6.66 \times 10^{-1}$  | 0.74     | $1.14 \times 10^1$ |
| 600     | $2.49 \times 10^9$ | $2.46 \times 10^9$ | 0.99     | 1.08           | 4.84                   | 3.60                   | 0.74     | 7.73               |
| 650     | $2.93 \times 10^9$ | $2.88 \times 10^9$ | 0.98     | 1.07           | $2.01 \times 10^1$     | $1.50 \times 10^1$     | 0.75     | 5.69               |
| 700     | $3.36 \times 10^9$ | $3.30 \times 10^9$ | 0.98     | 1.06           | $6.78 \times 10^1$     | $5.08 \times 10^1$     | 0.75     | 4.46               |
| 725     | $3.58 \times 10^9$ | $3.51 \times 10^9$ | 0.98     | 1.06           | $1.17 \times 10^2$     | $8.79 \times 10^1$     | 0.75     | 4.02               |
| 775     | $4.01 \times 10^9$ | $3.92 \times 10^9$ | 0.98     | 1.05           | $3.15 \times 10^2$     | $2.37 \times 10^2$     | 0.75     | 3.37               |
| 800     | $4.22 \times 10^9$ | $4.12 \times 10^9$ | 0.98     | 1.05           | $4.92 \times 10^2$     | $3.71 \times 10^2$     | 0.75     | 3.12               |
| 825     | $4.42 \times 10^9$ | $4.32 \times 10^9$ | 0.98     | 1.04           | $7.50 \times 10^2$     | $5.66 \times 10^2$     | 0.75     | 2.91               |
| 850     | $4.63 \times 10^9$ | $4.52 \times 10^9$ | 0.98     | 1.04           | $1.12 \times 10^3$     | $8.43 \times 10^2$     | 0.76     | 2.73               |
| 875     | $4.83 \times 10^9$ | $4.71 \times 10^9$ | 0.97     | 1.04           | $1.62 \times 10^3$     | $1.23 \times 10^3$     | 0.76     | 2.57               |
| 900     | $5.04 \times 10^9$ | $4.91 \times 10^9$ | 0.97     | 1.04           | $2.31 \times 10^3$     | $1.75 \times 10^3$     | 0.76     | 2.44               |

**Table S9: Tunneling coefficient for SHAT and DHAT path at various different temperatures.**

| Temp(K) | SHAT           |                |                   | DHAT               |                    |                    |
|---------|----------------|----------------|-------------------|--------------------|--------------------|--------------------|
|         | $\kappa_{SCT}$ | $\kappa_{ZCT}$ | $\kappa_{Eckart}$ | $\kappa_{SCT}$     | $\kappa_{ZCT}$     | $\kappa_{Eckart}$  |
| 213     | 1.97           | 1.65           | 2.21              | $4.02 \times 10^5$ | $2.02 \times 10^5$ | $1.02 \times 10^6$ |
| 216     | 1.93           | 1.63           | 2.17              | $3.00 \times 10^5$ | $1.57 \times 10^5$ | $5.80 \times 10^5$ |
| 219     | 1.90           | 1.61           | 2.13              | $2.27 \times 10^5$ | $1.22 \times 10^5$ | $3.38 \times 10^5$ |
| 224     | 1.84           | 1.57           | 2.07              | $1.46 \times 10^5$ | $8.25 \times 10^4$ | $1.44 \times 10^5$ |
| 230     | 1.78           | 1.53           | 2.01              | $8.89 \times 10^4$ | $5.27 \times 10^4$ | $5.59 \times 10^4$ |
| 235     | 1.74           | 1.50           | 1.96              | $6.04 \times 10^4$ | $3.70 \times 10^4$ | $2.69 \times 10^4$ |
| 250     | 1.62           | 1.43           | 1.84              | $2.13 \times 10^4$ | $1.41 \times 10^4$ | $4.00 \times 10^3$ |
| 259     | 1.57           | 1.39           | 1.78              | $1.23 \times 10^4$ | $8.38 \times 10^3$ | $1.53 \times 10^3$ |
| 265     | 1.54           | 1.37           | 1.75              | $8.70 \times 10^3$ | $6.06 \times 10^3$ | $8.68 \times 10^2$ |
| 278     | 1.48           | 1.33           | 1.68              | $4.40 \times 10^3$ | $3.17 \times 10^3$ | $3.00 \times 10^2$ |
| 280     | 1.47           | 1.33           | 1.67              | $3.99 \times 10^3$ | $2.89 \times 10^3$ | $2.59 \times 10^2$ |
| 290     | 1.43           | 1.30           | 1.63              | $2.50 \times 10^3$ | $1.85 \times 10^3$ | $1.34 \times 10^2$ |
| 298     | 1.40           | 1.28           | 1.60              | $1.77 \times 10^3$ | $1.33 \times 10^3$ | $8.54 \times 10^1$ |
| 300     | 1.39           | 1.28           | 1.59              | $1.63 \times 10^3$ | $1.23 \times 10^3$ | $7.70 \times 10^1$ |
| 310     | 1.36           | 1.26           | 1.56              | $1.10 \times 10^3$ | $8.38 \times 10^2$ | $4.81 \times 10^1$ |
| 320     | 1.34           | 1.24           | 1.53              | $7.59 \times 10^2$ | $5.89 \times 10^2$ | $3.24 \times 10^1$ |
| 330     | 1.31           | 1.22           | 1.50              | $5.40 \times 10^2$ | $4.24 \times 10^2$ | $2.31 \times 10^1$ |
| 350     | 1.27           | 1.19           | 1.46              | $2.93 \times 10^2$ | $2.35 \times 10^2$ | $1.36 \times 10^1$ |
| 375     | 1.23           | 1.17           | 1.41              | $1.52 \times 10^2$ | $1.25 \times 10^2$ | 8.49               |
| 400     | 1.20           | 1.15           | 1.37              | $8.75 \times 10^1$ | $7.33 \times 10^1$ | 6.06               |
| 425     | 1.18           | 1.13           | 1.34              | $5.45 \times 10^1$ | $4.65 \times 10^1$ | 4.72               |
| 450     | 1.16           | 1.11           | 1.31              | $3.63 \times 10^1$ | $3.14 \times 10^1$ | 3.90               |
| 475     | 1.14           | 1.10           | 1.29              | $2.55 \times 10^1$ | $2.24 \times 10^1$ | 3.35               |
| 500     | 1.12           | 1.09           | 1.27              | $1.88 \times 10^1$ | $1.67 \times 10^1$ | 2.97               |
| 550     | 1.10           | 1.07           | 1.23              | $1.14 \times 10^1$ | $1.03 \times 10^1$ | 2.47               |
| 600     | 1.08           | 1.06           | 1.21              | 7.73               | 7.08               | 2.17               |
| 650     | 1.07           | 1.05           | 1.19              | 5.69               | 5.28               | 1.96               |
| 700     | 1.06           | 1.04           | 1.17              | 4.46               | 4.18               | 1.82               |
| 725     | 1.06           | 1.04           | 1.16              | 4.02               | 3.79               | 1.76               |
| 775     | 1.05           | 1.04           | 1.15              | 3.37               | 3.19               | 1.66               |
| 800     | 1.05           | 1.03           | 1.15              | 3.12               | 2.97               | 1.63               |
| 825     | 1.04           | 1.03           | 1.14              | 2.91               | 2.78               | 1.59               |
| 850     | 1.04           | 1.03           | 1.13              | 2.73               | 2.61               | 1.56               |
| 875     | 1.04           | 1.03           | 1.13              | 2.57               | 2.47               | 1.53               |
| 900     | 1.04           | 1.03           | 1.13              | 2.44               | 2.35               | 1.51               |

**Table S10: Bimolecular rate constant values ( $k_{uncat}$  in  $\text{cm}^3 \text{ molecule}^{-1} \text{ s}^{-1}$ ) for uncatalyzed channel obtained at CVT/SCT, TST/ZCT and TST/Eckart method at various temperature range.**

| Temp (K) | CVT/SCT                | TST/ZCT                | TST/Eckart             |
|----------|------------------------|------------------------|------------------------|
| 213      | $5.63 \times 10^{-16}$ | $5.21 \times 10^{-16}$ | $3.26 \times 10^{-16}$ |
| 216      | $5.89 \times 10^{-16}$ | $5.48 \times 10^{-16}$ | $3.50 \times 10^{-16}$ |
| 219      | $6.16 \times 10^{-16}$ | $5.77 \times 10^{-16}$ | $3.75 \times 10^{-16}$ |
| 224      | $6.63 \times 10^{-16}$ | $6.28 \times 10^{-16}$ | $4.19 \times 10^{-16}$ |
| 230      | $7.23 \times 10^{-16}$ | $6.93 \times 10^{-16}$ | $4.77 \times 10^{-16}$ |
| 235      | $7.76 \times 10^{-16}$ | $7.51 \times 10^{-16}$ | $5.30 \times 10^{-16}$ |
| 250      | $9.55 \times 10^{-16}$ | $9.44 \times 10^{-16}$ | $7.09 \times 10^{-16}$ |
| 259      | $1.08 \times 10^{-15}$ | $1.08 \times 10^{-15}$ | $8.34 \times 10^{-16}$ |
| 265      | $1.16 \times 10^{-15}$ | $1.17 \times 10^{-15}$ | $9.24 \times 10^{-16}$ |
| 278      | $1.37 \times 10^{-15}$ | $1.39 \times 10^{-15}$ | $1.14 \times 10^{-15}$ |
| 280      | $1.41 \times 10^{-15}$ | $1.43 \times 10^{-15}$ | $1.18 \times 10^{-15}$ |
| 290      | $1.58 \times 10^{-15}$ | $1.62 \times 10^{-15}$ | $1.37 \times 10^{-15}$ |
| 298      | $1.74 \times 10^{-15}$ | $1.79 \times 10^{-15}$ | $1.53 \times 10^{-15}$ |
| 300      | $1.78 \times 10^{-15}$ | $1.83 \times 10^{-15}$ | $1.58 \times 10^{-15}$ |
| 310      | $1.99 \times 10^{-15}$ | $2.05 \times 10^{-15}$ | $1.80 \times 10^{-15}$ |
| 320      | $2.22 \times 10^{-15}$ | $2.30 \times 10^{-15}$ | $2.05 \times 10^{-15}$ |
| 330      | $2.46 \times 10^{-15}$ | $2.56 \times 10^{-15}$ | $2.32 \times 10^{-15}$ |
| 350      | $3.01 \times 10^{-15}$ | $3.13 \times 10^{-15}$ | $2.91 \times 10^{-15}$ |
| 375      | $3.79 \times 10^{-15}$ | $3.95 \times 10^{-15}$ | $3.77 \times 10^{-15}$ |
| 400      | $4.69 \times 10^{-15}$ | $4.89 \times 10^{-15}$ | $4.77 \times 10^{-15}$ |
| 425      | $5.73 \times 10^{-15}$ | $5.96 \times 10^{-15}$ | $5.90 \times 10^{-15}$ |
| 450      | $6.89 \times 10^{-15}$ | $7.16 \times 10^{-15}$ | $7.19 \times 10^{-15}$ |
| 475      | $8.20 \times 10^{-15}$ | $8.50 \times 10^{-15}$ | $8.62 \times 10^{-15}$ |
| 500      | $9.65 \times 10^{-15}$ | $9.98 \times 10^{-15}$ | $1.02 \times 10^{-14}$ |
| 550      | $1.30 \times 10^{-14}$ | $1.34 \times 10^{-14}$ | $1.39 \times 10^{-14}$ |
| 600      | $1.70 \times 10^{-14}$ | $1.74 \times 10^{-14}$ | $1.82 \times 10^{-14}$ |
| 650      | $2.17 \times 10^{-14}$ | $2.22 \times 10^{-14}$ | $2.32 \times 10^{-14}$ |
| 700      | $2.71 \times 10^{-14}$ | $2.76 \times 10^{-14}$ | $2.91 \times 10^{-14}$ |
| 725      | $3.01 \times 10^{-14}$ | $3.06 \times 10^{-14}$ | $3.23 \times 10^{-14}$ |
| 775      | $3.67 \times 10^{-14}$ | $3.73 \times 10^{-14}$ | $3.93 \times 10^{-14}$ |
| 800      | $4.04 \times 10^{-14}$ | $4.09 \times 10^{-14}$ | $4.32 \times 10^{-14}$ |
| 825      | $4.42 \times 10^{-14}$ | $4.47 \times 10^{-14}$ | $4.73 \times 10^{-14}$ |
| 850      | $4.83 \times 10^{-14}$ | $4.88 \times 10^{-14}$ | $5.16 \times 10^{-14}$ |
| 875      | $5.25 \times 10^{-14}$ | $5.31 \times 10^{-14}$ | $5.61 \times 10^{-14}$ |
| 900      | $5.71 \times 10^{-14}$ | $5.76 \times 10^{-14}$ | $6.09 \times 10^{-14}$ |

## References

- (1) Varandas, A.; Pansini, F. Narrowing the error in electron correlation calculations by basis set re-hierarchization and use of the unified singlet and triplet electron-pair extrapolation scheme: Application to a test set of 106 systems. *J. Chem. Phys.* **2014**, *141*, 224113.
- (2) Kállay, M.; Rolik, Z.; Csontos, J.; Ladjánszki, I.; Szegedy, L.; Ladóczki, B.; Samu, G.; Petrov, K.; Farkas, M.; Nagy, P. et al. MRCC, a quantum chemical program suite. *URL: <http://www.mrcc.hu>* **2016**,
